# Supplementary material for: Case of Poliomyelitis Caused by Significantly Diverged Derivative of the Poliovirus Type 3 Vaccine Sabin Strain Circulating in the Orphanage
Source: PubMed Central journal article supplement (PMC7552002; doi:10.3390/v12090970), 2020-09-01
Supplement: viruses-12-00970-s001.pdf [file viruses-12-00970-s001.pdf]

# Case of poliomyelitis caused by significantly diverged derivative of the poliovirus type 3 vaccine Sabin strain circulating in the orphanage

Ekaterina A. Korotkova<sup>1,\*</sup>, Maria A. Prostova<sup>2,a</sup>, Anatoly P. Gmyl<sup>2,3,b</sup>, Liubov I. Kozlovskaya<sup>2,3</sup>, Tatiana P. Eremeeva<sup>2</sup>, Olga Y. Baikova<sup>2</sup>, Alexandr Y. Krasota<sup>1,2</sup>, Nadezhda S. Morozova<sup>4</sup>, and Olga E. Ivanova<sup>2,3,\*</sup>

<sup>1</sup> Belozersky Institute of Physical-Chemical Biology, Lomonosov Moscow State University, Moscow, 119899, Russia; [katerkorot@yandex.ru](mailto:katerkorot@yandex.ru) (E.A.K.)

<sup>2</sup> Federal State Budgetary Scientific Institution “Chumakov Federal Scientific Centre for Research and Development of Immune-and-Biological Products of the Russian Academy of Sciences” (FSBSI “Chumakov FSC R&D IBP RAS”), Moscow, 108819, Russia; (A.P.G.); [prostovna@gmail.com](mailto:prostovna@gmail.com) (M.A.P.); [lubov\\_i\\_k@mail.ru](mailto:lubov_i_k@mail.ru) (L.I.K.); [poliom\\_ldms@mail.ru](mailto:poliom_ldms@mail.ru) (T.P.E.); [baikovaaa@mail.ru](mailto:baikovaaa@mail.ru) (O.Y.B.); [krasota@belozersky.msu.ru](mailto:krasota@belozersky.msu.ru) (A.Y.K.); [ivanova\\_oe@chumakovs.su](mailto:ivanova_oe@chumakovs.su) (O.E.I.)

<sup>3</sup> Sechenov First Moscow State Medical University, Moscow, 119991, Russia (O.E.I.; L.I.K.)

<sup>4</sup> Federal Centre of Hygiene and Epidemiology, Russian Federal Service for Surveillance on Consumer Rights Protection and Human Wellbeing, Moscow, 117105, Russia; [morozova.n.s@mail.ru](mailto:morozova.n.s@mail.ru) (N.S.M.)

<sup>a</sup> Now works at Institute of Molecular Genetics of the Russian Academy of Sciences, Moscow, 123182, Russia

<sup>b</sup> Deceased

\* Correspondence: [katerkorot@yandex.ru](mailto:katerkorot@yandex.ru); Tel.: +7- 916-169-86-12 (E.A.K.)

[ivanova\\_oe@chumakovs.su](mailto:ivanova_oe@chumakovs.su); Tel.: +7-916-677-24-03 (O.E.I.)

## Supplementary material

**Table S1.** Mutations in the genomes of the Syzran isolates

| Genome region                              | Nucleotide (amino acid) mutation             | Genome(s) of Syzran isolates harboring mutation | Genome region                              | Nucleotide (amino acid) mutation             | Genome(s) of Syzran isolates harboring mutation |             |
|--------------------------------------------|----------------------------------------------|-------------------------------------------------|--------------------------------------------|----------------------------------------------|-------------------------------------------------|-------------|
| 5'-UTR                                     | G <sub>113</sub> →A                          | all                                             | VP1                                        | C <sub>2493</sub> →U (T <sub>6</sub> →I)*    | all                                             |             |
|                                            | C <sub>123</sub> →U                          | C-2                                             |                                            | U <sub>2569</sub> →C                         | P-2                                             |             |
|                                            | G <sub>162</sub> →A                          | all but C-3                                     |                                            | A <sub>2599</sub> →G                         | all                                             |             |
|                                            | G <sub>189</sub> →C                          | P-2                                             |                                            | C <sub>2611</sub> →U                         | all                                             |             |
|                                            | C <sub>346</sub> →U                          | C-2                                             |                                            | C <sub>2637</sub> →U (A <sub>54</sub> →V)    | all                                             |             |
|                                            | G <sub>395</sub> →A                          | all                                             |                                            | A <sub>2638</sub> →G                         | C-2                                             |             |
|                                            | U <sub>472</sub> →C*                         | all                                             |                                            | U <sub>2693</sub> →A (S <sub>73</sub> →T)    | all                                             |             |
|                                            | U <sub>480</sub> →C                          | all                                             |                                            | A <sub>2762</sub> →G (T <sub>96</sub> →A)    | all                                             |             |
|                                            | U <sub>602</sub> →C                          | all                                             |                                            | U <sub>2790</sub> →C (M <sub>105</sub> →T)   | all                                             |             |
|                                            | G <sub>673</sub> →G/A                        | C-3                                             |                                            | G <sub>2959</sub> →A                         | all                                             |             |
|                                            | U <sub>708</sub> →C                          | C-3                                             |                                            | G <sub>2974</sub> →A                         | all                                             |             |
|                                            | U <sub>738</sub> →C                          | C-3                                             |                                            | A <sub>3338</sub> →G (N <sub>288</sub> →D)** | all                                             |             |
| VP4                                        | A <sub>772</sub> →G                          | all                                             |                                            | G <sub>3344</sub> →A (D <sub>290</sub> →N)** | all                                             |             |
| VP2                                        | A <sub>964</sub> →G                          | C-3                                             | 2A                                         | C <sub>3522</sub> →U (T <sub>49</sub> →I)    | all                                             |             |
|                                            | C <sub>1035</sub> →U (A <sub>29</sub> →V)    | P-1 and P-2                                     |                                            | G <sub>3579</sub> →A (R <sub>68</sub> →K)    | C-2                                             |             |
|                                            | C <sub>1084</sub> →U                         | C-2                                             |                                            | G <sub>3676</sub> →U                         | all                                             |             |
|                                            | U <sub>1126</sub> →C                         | C-3                                             |                                            | U <sub>3715</sub> →C                         | C-2                                             |             |
|                                            | C <sub>1141</sub> →U                         | C-3                                             | 2B                                         | U <sub>3778</sub> →C                         | all but C-3                                     |             |
|                                            | A <sub>1252</sub> →G                         | all                                             |                                            | U <sub>3838</sub> →C                         | all                                             |             |
|                                            | G <sub>1390</sub> →A                         | all                                             |                                            | G <sub>4066</sub> →A                         | all                                             |             |
|                                            | A <sub>1440</sub> →U (N <sub>164</sub> →I)** | C-1                                             |                                            | 2C                                           | G <sub>4342</sub> →A                            | all         |
|                                            | G <sub>1442</sub> →A (A <sub>165</sub> →T)** | all                                             |                                            |                                              | A <sub>4417</sub> →C                            | all         |
|                                            | U <sub>1446</sub> →C (V <sub>166</sub> →A)** | all                                             |                                            |                                              | A <sub>4433</sub> →G (T <sub>107</sub> →A)      | all         |
|                                            | G <sub>1477</sub> →A                         | all                                             |                                            |                                              | A <sub>4612</sub> →U                            | C-3         |
|                                            | U <sub>1540</sub> →C                         | all                                             |                                            |                                              | G <sub>4630</sub> →A                            | all         |
|                                            | U <sub>1543</sub> →C                         | all                                             |                                            |                                              | U <sub>4663</sub> →C                            | all         |
|                                            | U <sub>1591</sub> →C                         | P-1 and P-2                                     |                                            |                                              | A <sub>4771</sub> →G                            | P-1 and P-2 |
| U <sub>1592</sub> →C (L <sub>215</sub> →M) | all                                          | C <sub>4774</sub> →U                            | C-2                                        |                                              |                                                 |             |
| C <sub>1596</sub> →U (A <sub>216</sub> →V) | C-3                                          | C <sub>4786</sub> →U                            | P-2                                        |                                              |                                                 |             |
| VP3                                        | C <sub>1795</sub> →U                         | all but C-3                                     | U <sub>4849</sub> →C                       |                                              | all                                             |             |
|                                            | G <sub>1807</sub> →A                         | C-2                                             | A <sub>4861</sub> →G                       | all                                          |                                                 |             |
|                                            | U <sub>1855</sub> →C                         | C-2                                             | G <sub>4868</sub> →A (G <sub>252</sub> →S) | all                                          |                                                 |             |
|                                            | C <sub>1998</sub> →U (S <sub>79</sub> →L)**  | C-2                                             | A <sub>4872</sub> →G (E <sub>253</sub> →G) | all                                          |                                                 |             |
|                                            | U <sub>2034</sub> →C (F <sub>91</sub> →S)*   | all but C-3                                     | C <sub>4917</sub> →U (T <sub>268</sub> →M) | all                                          |                                                 |             |
|                                            | U <sub>2299</sub> →C                         | all but C-3                                     | U <sub>5035</sub> →C                       | P-1 and P-2                                  |                                                 |             |
|                                            | U <sub>2340</sub> →A (F <sub>193</sub> →Y)   | C-3                                             |                                            |                                              |                                                 |             |
|                                            | U <sub>2413</sub> →C                         | all                                             |                                            |                                              |                                                 |             |

\*Adaptive mutations

\*\*Mutations in the antigenic sites

| Genome region | Nucleotide (amino acid) mutation           | Genome(s) of Syzran isolates harboring mutation |
|---------------|--------------------------------------------|-------------------------------------------------|
| 3A            | C <sub>5116</sub> →U                       | C-3                                             |
|               | A <sub>5119</sub> →G                       | P-1 and P-2                                     |
|               | G <sub>5146</sub> →U (R <sub>15</sub> →S)  | all                                             |
|               | A <sub>5158</sub> →G                       | P-1 and P-2                                     |
|               | C <sub>5357</sub> →U (H <sub>86</sub> →Y)  | C-3                                             |
| 3B            | A <sub>5365</sub> →G                       | C-2                                             |
|               | C <sub>5386</sub> →U                       | all                                             |
|               | U <sub>5398</sub> →C                       | all                                             |
|               | G <sub>5425</sub> →A                       | all                                             |
| 3C            | C <sub>5524</sub> →U                       | all                                             |
|               | A <sub>5567</sub> →G (I <sub>47</sub> →V)  | all                                             |
|               | C <sub>5597</sub> →U                       | C-2                                             |
|               | C <sub>5602</sub> →A (D <sub>58</sub> →E)  | all but C-3                                     |
|               | C <sub>5677</sub> →U                       | all                                             |
|               | U <sub>5832</sub> →C (I <sub>135</sub> →T) | all                                             |
|               | C <sub>5854</sub> →U                       | all                                             |

| Genome region | Nucleotide (amino acid) mutation               | Genome(s) of Syzran isolates harboring mutation |
|---------------|------------------------------------------------|-------------------------------------------------|
| 3D            | G <sub>6086</sub> →A (V <sub>37</sub> →I)      | all                                             |
|               | A <sub>6109</sub> →G                           | all                                             |
|               | U <sub>6157</sub> →C                           | all but C-3                                     |
|               | U <sub>6244</sub> →C                           | all                                             |
|               | C <sub>6266</sub> →C/U                         | C-3                                             |
|               | G <sub>6304</sub> →C                           | all                                             |
|               | C <sub>6337</sub> →U                           | C-2                                             |
|               | U <sub>6364</sub> →U/C                         | C-3                                             |
|               | A <sub>6490</sub> →G                           | all                                             |
|               | U <sub>6550</sub> →C                           | all                                             |
|               | U <sub>6562</sub> →C                           | all                                             |
|               | C <sub>6589</sub> →U                           | all                                             |
|               | C <sub>6592</sub> →U                           | C-2                                             |
|               | A <sub>6658</sub> →G                           | C-2                                             |
|               | A <sub>6664</sub> →A/G                         | C-3                                             |
|               | C <sub>6769</sub> →U                           | all                                             |
|               | U <sub>6877</sub> →C                           | all                                             |
|               | A <sub>6918</sub> →A/G (K <sub>314</sub> →K/R) | C-3                                             |
|               | U <sub>6938</sub> →C                           | all                                             |
|               | U <sub>7291</sub> →C                           | all                                             |
|               | A <sub>7303</sub> →A/G                         | C-3                                             |
|               | A <sub>7321</sub> →A/U                         | C-1                                             |
|               | U <sub>7360</sub> →C                           | C-2                                             |

\*Adaptive mutations

\*\*Mutations in the antigenic sites

**Table S2.** Mutations\* in the genomes of Syzran isolates found in other vaccine-related polioviruses type 3.

| Genome region                              | Nucleotide (amino acid) mutation           | Genome(s) of Syzran isolates harboring mutation | Known or assumed biological relevance of mutation | Previous report (s) of same mutation in Sabin-3-derived viruses |
|--------------------------------------------|--------------------------------------------|-------------------------------------------------|---------------------------------------------------|-----------------------------------------------------------------|
| 5'-UTR                                     | G <sub>162</sub> →A                        | all but C-3                                     | Stabilization of domain II structure              | 1, 2                                                            |
|                                            | G <sub>395</sub> →A                        | all                                             | Stabilization of domain IV structure              | 1-4                                                             |
|                                            | U <sub>480</sub> →C                        | all                                             | Stabilization of domain V structure               | 1, 2                                                            |
|                                            | U <sub>602</sub> →C                        | all                                             | –                                                 | 1, 5                                                            |
|                                            | U <sub>738</sub> →C                        | C-3                                             | –                                                 | 1                                                               |
| VP4                                        | A <sub>772</sub> →G                        | all                                             | –                                                 | 4                                                               |
| VP2                                        | A <sub>964</sub> →G                        | C-3                                             | –                                                 | 2                                                               |
|                                            | C <sub>1035</sub> →U (A <sub>29</sub> →V)  | P-1, P-2                                        | –                                                 | 6                                                               |
|                                            | G <sub>1390</sub> →A                       | all                                             | –                                                 | 2                                                               |
|                                            | G <sub>1442</sub> →A (A <sub>165</sub> →T) | all                                             | Region of antigenic site 2                        | 1, 7**, 8                                                       |
|                                            | U <sub>1446</sub> →C (V <sub>166</sub> →A) | all                                             | Antigenic site 2                                  | 1, 7                                                            |
| U <sub>1592</sub> →C (L <sub>215</sub> →M) | all                                        | –                                               | 1                                                 |                                                                 |
| VP3                                        | C <sub>1795</sub> →U                       | all but C-3                                     | –                                                 | 1                                                               |
|                                            | C <sub>1998</sub> →U (S <sub>79</sub> →L)  | C-2                                             | Antigenic site 4                                  | 9                                                               |
|                                            | U <sub>2299</sub> →C                       | all but C-3                                     | –                                                 | 1, 2                                                            |
|                                            | U <sub>2413</sub> →C                       | all                                             | –                                                 | 5                                                               |
| VP1                                        | C <sub>2637</sub> →U (A <sub>54</sub> →V)  | all                                             | –                                                 | 1, 2, 4, 5, 9, 10                                               |
|                                            | U <sub>2790</sub> →C (M <sub>105</sub> →T) | all                                             | Interaction with poliovirus receptor              | 1, 2, 3, 5, 7, 9, 10                                            |
|                                            | A <sub>3338</sub> →G (N <sub>288</sub> →D) | all                                             | Antigenic site 3                                  | 1, 2, 9                                                         |
|                                            | G <sub>3344</sub> →A (D <sub>290</sub> →N) | all                                             | Antigenic site 3                                  | 1                                                               |
| 2A                                         | G <sub>3676</sub> →U                       | all                                             | –                                                 | 1                                                               |
|                                            | U <sub>3778</sub> →C                       | all but C-3                                     | –                                                 | 2                                                               |
| 2C                                         | A <sub>4433</sub> →G (T <sub>107</sub> →A) | all                                             | –                                                 | 1                                                               |
|                                            | C <sub>4917</sub> →U (T <sub>268</sub> →M) | all                                             | –                                                 | 4, 9                                                            |
| 3C                                         | U <sub>5832</sub> →C (I <sub>135</sub> →T) | all                                             | Stabilization of ciRNA structure                  | 1, 11                                                           |

\*Without three known adaptive mutations observed in most variants of Sabin-3.

\*\*In this article only amino acid substitutions were listed.

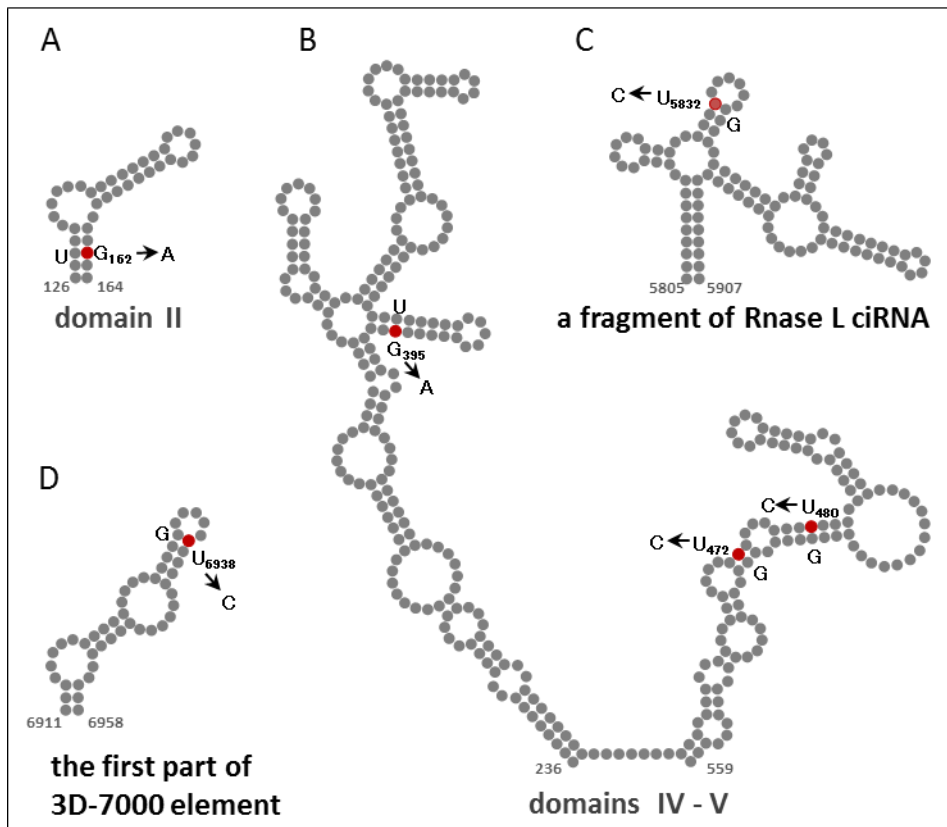

**Figure S1.** Nucleotide substitutions in the phylogenetically conserved RNA structural elements of the genomes of the poliovirus isolates, in comparison with the Sabin-3 strain. The positions of changed nucleotides are marked in red, and corresponding mutations are indicated; the nucleotides involved in the resulting base-pairing are also shown. A. Domain II of 5'UTR. B. Domains IV-V of 5'UTR [12]. C. A fragment of Rnase L competitive inhibitor element of viral RNA (ciRNA) [13]. D. The first conservative structural element of 3D-7000 [14].

## References

1. Laassri M.; Zagorodnyaya T.; Chumakov K. Vaccine Derived Poliovirus RNA Sequences (Unpublished).
2. Rakoto-Andrianarivelo M.; Gumede N.; Jegouic S.; Balanant J.; Andriamamonjy S.N.; Rabemanantsoa S.; Birmingham M.; Randriamanalina B.; Nkolomoni L.; Venter M.; Schoub B.D.; Delpeyroux F.; Reynes J.M. Reemergence of recombinant vaccine-derived poliovirus outbreak in Madagascar. *J Infect Dis.* **2008**, 197, 1427-1435, doi: 10.1086/587694.
3. Blomqvist S.; Savolainen-Kopra C.; Paananen A.; El Bassioni L.; El Maamoon Nasr E.M.; Firstova L.; Zamiatina N.; Kutateladze T.; Roivainen M. Recurrent isolation of poliovirus 3 strains with chimeric capsid protein Vp1 suggests a re-combination hot-spot site in Vp1. *Virus Res.* **2010**, 151, 246-251, doi: 10.1016/j.virusres.2010.05.006.
4. Shahmahmoodi S.; Parvaneh N.; Burns C.; Asghar H.; Mamishi S.; Tabatabaie H.; Chen Q.; Teimourian S.; Gooya M.M.; Esteghamati A.R.; Mousavi T.; Yousefi M.; Farrokhi K.; Mashlool M.; Kew O.; Nategh R. Isolation of a type 3 vaccine-derived poliovirus (VDPV) from an Iranian child with X-linked agammaglobulinemia. *Virus Res.* **2008**, 137, 168-172, doi: 10.1016/j.virusres.2008.07.006.
5. Savolainen-Kopra C.; Samoilovich E.; Kahelin H.; Hiekka A.K.; Hovi T.; Roivainen M. Comparison of poliovirus recombinants: accumulation of point mutations provides further advantages. *J Gen Virol.* **2009**, 90, 1859-1868, doi: 10.1099/vir.0.010942-0.
6. Casseiro K.M.S.M.; Burlandy F.M.; da Silva EE. Rare natural type 3/type 2 intertypic capsid recombinant vaccine-related poliovirus isolated from a case of acute flaccid paralysis in Brazil, 2015. *J Gen Virol.* **2016**, 97, 1545-1550, doi: 10.1099/jgv.0.000484.
7. Yakovenko M.L.; Cherkasova E.A.; Rezapkin G.V.; Ivanova O.E.; Ivanov A.P.; Ereemeeva T.P.; Baykova O.Y.; Chumakov K.M.; Agol V.I. Antigenic evolution of vaccine-derived polioviruses: changes in individual epitopes and relative stability of the overall immunological properties. *J Virol.* **2006**, 80, 2641-2653, doi:10.1128/JVI.80.6.2641-2653.2006.
8. Blomqvist S.; Bruu A.L.; Stenvik M.; Hovi T. Characterization of a recombinant type 3/type 2 poliovirus isolated from a healthy vaccinee and containing a chimeric capsid protein VP1. *J Gen Virol.* **2003**, 84, 573-580, doi: 10.1099/vir.0.18708-0.
9. World Health Organization (WHO). Report of the second meeting of the technical consultation group for global eradication of poliomyelitis. WHO/EPI/GEN/98/04. Geneva, Switzerland, 1998. Available online: [http://apps.who.int/iris/bitstream/10665/63994/1/WHO\\_EPI\\_GEN\\_98.04.pdf](http://apps.who.int/iris/bitstream/10665/63994/1/WHO_EPI_GEN_98.04.pdf) )
10. Cherkasova E.; Laassri M.; Chizhikov V.; Korotkova E.; Dragunsky E.; Agol V.I.; Chumakov K. Microarray analysis of evolution of RNA viruses: evidence of circulation of virulent highly divergent vaccine-derived polioviruses. *Proc Natl Acad Sci USA.* **2003**, 100, 9398-9403, doi: 10.1073/pnas.1633511100.
11. Famulare M.; Chang S.; Iber J.; Zhao K.; Adeniji J.A.; Bukbuk D.; Baba M.; Behrend M.; Burns C.C.; Oberste M.S. Sabin vaccine reversion in the field: a comprehensive analysis of Sabin-like poliovirus isolates in Nigeria. *J Virol.* **2015**, 90, 317-331, doi: 10.1128/JVI.01532-15.
12. Pilipenko E.V.; Blinov V.M.; Romanova L.I.; Sinyakov A.N.; Maslova S.V. Agol V.I. Conserved structural domains in the 5'-untranslated region of picornaviral genomes: an analysis of the segment controlling translation and neurovirulence. *Virology.* **1989**, 168, 201-209, doi:10.1016/0042-6822(89)90259-6.
13. Han J.Q.; Townsend H.L.; Jha B.K.; Paranjape J.M.; Silverman R.H.; Barton D.J. A phylogenetically conserved RNA structure in the poliovirus open reading frame inhibits the antiviral endoribonuclease RNase L. *J Virol.* **2007**, 81, 5561-5572, doi:10.1128/JVI.01857-06.
14. Burrill C.P.; Westesson O.; Schulte M.B.; Strings V.R.; Segal M.; Andino R.J. Global RNA structure analysis of poliovirus identifies a conserved RNA structure involved in viral replication and infectivity. *Virology.* **2013**, 87, 11670-11683, doi: 10.1128/JVI.01560-13.
